# Supplementary material
Source: publisher figshare collection journal article supplement (https://tandf.figshare.com/ndownloader/files/15327143)
Supplement: Supplementary file 1 [file 15327143]

**Supplemental Material**

Syntaxonomy of the *Robinia pseudoacacia* communities in the central peri-Adriatic sector of the Italian peninsula

Marina Allegrezza*, Silvia Montecchiari, Cecilia Ottaviani, Veronica Pelliccia, Giulio Tesei

Department of Agricultural, Food and Environmental Sciences, Marche Polytechnic University, Via Brecce Bianche,I-60131 Ancona, Italy.

*Corresponding author: Marina Allegrezza

Department of Agricultural, Food and Environmental Sciences,

Marche Polytechnic University,

Via Brecce Bianche

I-60131 Ancona, Italy

Tel: +39-071-2204951

Email: m.allegrezza@univpm.it

Table S1. Synoptic table of the *Robinia pseudoacacia* sintaxa belonging to the *Chelidonio majoris-Robinietalia pseudoacaciae* order in Italian peninsula and in Europe

|  |  |  |  |  |  |  |  |  |  |  |  |
| --- | --- | --- | --- | --- | --- | --- | --- | --- | --- | --- | --- |
|  |  | N. columns | 1 | 2 | 3 | 4 | 5 | 6 | 7 | 8 | Pres. |
| **Biological form** | **Chorotype** | N. rel per column | 30 | 15 | 10 | 8 | 7 | 13 | 15 | 33 |
|  |  |  |  |  |  |  |  |  |  |  |  |
|  |  | ***Melisso altissimae-Robinietum pseudoacaciae*** | | | |  |  |  |  |  |  |
| H scap | Eur./W-Asiat. | Lamium maculatum | II |  |  | II | I |  |  | I | 4 |
| H caesp | Eurasiat. | Carex pendula | II | I | I |  |  |  |  |  | 3 |
| G rhiz | SW-Eur. | Chamaeiris foetidissima | I | I |  |  |  |  |  |  | 2 |
| T scap | Medit. | Anisantha diandra | I | I |  |  |  |  |  |  | 2 |
| H scap | Euri-Medit. | Melissa officinalis subsp. officinalis | III |  |  |  |  |  |  |  | 1 |
| H scap | Steno-Medit. | Melissa officinalis subsp. altissima | II |  |  |  |  |  |  |  | 1 |
| G rhiz | SE-Eur. | Symphytum tuberosum subsp. angustifolium | I |  |  |  |  |  |  |  | 1 |
| T scap | E-Medit. | Sinapis alba | I |  |  |  |  |  |  |  | 1 |
| G bulb | Medit. | Bellevalia romana | I |  |  |  |  |  |  |  | 1 |
|  |  |  |  |  |  |  |  |  |  |  |  |
|  |  | ***Rubio peregrinae-Robinietum pseudoacaciae*** | | | |  |  |  |  |  |  |
| P caesp | Eur. | Cornus sanguinea | III | V | I | V |  |  | II | I | 6 |
| P scap | S-Eur./W-Asiat. | Fraxinus ornus |  | III | III | II | I |  |  |  | 4 |
| P lian | W-Eur./Medit. | Rubia peregrina | I | III | I |  |  |  |  |  | 3 |
| G rhiz | Steno-Medit | Arundo plinii | I | II |  |  |  |  |  |  | 2 |
| G rhiz | Medit. | Asparagus acutifolius | II | III |  |  |  |  |  |  | 2 |
| H bienn | Eurasiat./N-Afr. | Inula conyzae | I | II |  |  |  |  |  |  | 2 |
| T scap | N-Am. | Erigeron canadensis |  | I |  |  |  |  |  |  | 1 |
| P caesp | Medit. | Rhamnus alaternus |  | I |  |  |  |  |  |  | 1 |
| P caesp | Medit. | Viburnum tinus |  | I |  |  |  |  |  |  | 1 |
|  |  |  |  |  |  |  |  |  |  |  |  |
|  |  | ***Sambuco nigrae-Robinietum pseudoacaciae*** | | | |  |  |  |  |  |  |
| P caesp | Eur. | Euonymus europaeus | III | III | V | III | I | I | II |  | 7 |
| P lian | Medit. | Lonicera etrusca |  | I | III |  |  |  |  |  | 2 |
| NP | Medit. | Rosa sempervirens | I |  | I |  |  |  |  |  | 2 |
| G rhiz | S-Eur. | Asparagus tenuifolius |  |  | III | I |  |  |  |  | 2 |
| NP |  | Rubus hirtus group |  |  | III |  |  |  |  |  | 1 |
| P scap | W-Med. | Pinus pinaster |  |  | II |  |  |  |  |  | 1 |
|  |  |  |  |  |  |  |  |  |  |  |  |
|  |  | ***Lauro nobilis-Robinion pseudoacaciae*** | | |  |  |  |  |  |  |  |
| NP | Euri-Medit. Eur. | Rubus ulmifolius | V | V | III | II | V |  |  |  | 5 |
| G rhiz | Medit. | Arum italicum | V | II | II | I | I |  |  |  | 5 |
| NP | Eur./W-Asiat. | Ligustrum vulgare | II | I | II | III |  |  | II |  | 5 |
| H ros | Medit. | Viola alba subsp. dehnhardtii | II | I | I |  | I |  |  |  | 4 |
| P caesp | Medit. | Laurus nobilis | III | V | II |  |  |  |  |  | 3 |
| G rhiz | Medit. | Ruscus aculeatus | I | I | V |  |  |  |  |  | 3 |
| P scap | Medit. | Quercus ilex | I | I | I |  |  |  |  |  | 3 |
| G bulb | S-Eur. | Cyclamen hederifolium | I | I | II |  |  |  |  |  | 3 |
| P lian |  | Vitis vinifera s.l | I | I |  | II |  |  |  |  | 3 |
| P scap | E-Asiat. | Ailanthus altissima | I | II |  |  |  |  |  |  | 2 |
| H caesp | Eur. | Brachypodium rupestre | I | II |  |  |  |  |  |  | 2 |
| G rhiz | Medit. | Petasites pyrenaicus | I | I |  |  |  |  |  |  | 2 |
| P scap | Medit./SW-Asiat. | Ficus carica | I | II |  |  |  |  |  |  | 2 |
| P scap | SE-Eur./SW-Asiat. | Juglans regia | I | II |  |  |  |  |  |  | 2 |
| H scap | W-Eur./Medit. | Parietaria judaica | II | I |  |  | I |  |  |  | 3 |
|  |  |  |  |  |  |  |  |  |  |  |  |
|  |  | ***Bryonio dioicae-Sambucetum nigrae*** | |  |  |  |  |  |  |  |  |
| NP | Eur./W-Asiat. | Rubus caesius |  |  | I | IV |  |  | IV |  | 3 |
| H scap | Eur. | Heracleum sphondylium |  |  |  | II |  |  | I |  | 2 |
| H scap | S-Eur. | Xanthoselinum venetum |  |  |  | II |  |  |  |  | 1 |
| P lian | SE-Eur. | Lonicera caprifolium |  |  |  | II |  |  |  |  | 1 |
| G rad | S-Eur. | Aristolochia clematitis |  |  |  | II |  |  |  |  | 1 |
| H scap | E-Asiat. | Artemisia verlotiorum |  |  |  | II |  |  |  |  | 1 |
| P lian | S-Eur./W-Asiat. | Clematis viticella |  |  |  | II |  |  |  |  | 1 |
|  |  |  |  |  |  |  |  |  |  |  |  |
|  |  | ***Bryonio-Robinietum*** and ***Bryonio-Robinion*** | | | |  |  |  |  |  |  |
| P lian | Eur./SW-Asiat. | Hedera helix | V | V | IV | IV | IV |  |  |  | 5 |
| P lian | Eurasiat./N-Am. | Humulus lupulus | I |  | I | IV | IV |  | II |  | 5 |
| G rad | W-Eur./Medit. | Dioscorea communis | I | I | IV | II | V |  |  |  | 5 |
| G bulb | Medit. | Muscari comosum |  |  | I | I | I | I |  |  | 4 |
| H scand | W-Eur./Medit. | Bryonia dioica |  |  |  | V | IV |  |  |  | 2 |
| H scap | Eurasiat. | Artemisia vulgaris |  |  |  |  | III | I |  |  | 2 |
| H bienn | Eurasiat. | Lactuca serriola |  |  |  |  | IV | IV |  |  | 2 |
| G rhiz | Eurasiat. | Elymus repens |  |  |  |  | III | II |  |  | 2 |
|  |  |  |  |  |  |  |  |  |  |  |  |
|  |  | ***Balloto nigrae-Robinion pseudoacaciae*** | | |  |  |  |  |  |  |  |
| T scap | Eur. | Chaerophyllium temulum | II | I |  |  | I | II |  | I | 5 |
| H scap | E-Eur. | Ballota nigra |  |  |  |  | II | V | II | I | 4 |
| T scap | Eurasiat. | Anisantha sterilis |  |  |  | II | IV | V |  |  | 3 |
| H caesp | Eurasiat. | Poa angustifolia |  |  |  |  |  | V | I | I | 3 |
| H caesp | Eurasiat. | Calamagrostis epigeios |  |  |  |  |  | II |  | I | 2 |
| H bienn | Eurasiat. | Cynoglossum officinale |  |  |  |  |  | III |  |  | 1 |
|  |  |  |  |  |  |  |  |  |  |  |  |
|  |  | ***Chelidionio majoris-Robinietum pseudoacaciae*** and ***Chelidonio majoris-Robinion pseudoacaciae*** | | | | | | | | | |
| T scap | Eurasiat./N-Am. | Geranium robertianum |  |  |  |  | I | II | IV | I | 4 |
| H caesp | Eurasiat./N-Am. | Poa nemoralis |  |  |  |  |  | I | IV | III | 3 |
| H scap | Eur. | Anthriscus sylvestris |  |  |  |  |  |  | II | I | 2 |
| H ros | Eurasiat. | Viola hirta |  |  |  | II |  |  | III |  | 2 |
|  |  |  |  |  |  |  |  |  |  |  |  |
|  |  | ***Euphorbio cyparissiae - Robinietum pseudoacaciae*** and ***Euphorbio cyparissiae - Robinion pseudoacaciae*** | | | | | | | | | |
| H scap | Eur. | Euphorbia cyparissias |  |  |  |  |  | I |  | IV | 2 |
| T scap | S-Eur. | Arenaria serpyllifolia |  |  |  |  |  | I |  | I | 2 |
| Ch suffr | Eurasiat. | Artemisia campestris |  |  |  |  |  |  |  | III | 1 |
| H bienn | Eurasiat. | Verbascum lychnitis |  |  |  |  |  |  |  | III | 1 |
| G rhiz | Eurasiat. | Carex humilis |  |  |  |  |  |  |  | II | 1 |
| H bienn | Eurasiat. | Centaurea stoebe |  |  |  |  |  | I |  | III | 2 |
| H caesp | E-Eur./W-Asiat. | Melica transsilvanica |  |  |  |  |  |  |  | IV | 1 |
| T scap | Medit. | Clinopodium acinos |  |  |  |  |  | I |  | I | 2 |
| H caesp | Eurasiat. | Phleum phleoides |  |  |  |  |  |  |  | I | 1 |
|  |  |  |  |  |  |  |  |  |  |  |  |
|  |  | ***Chelidonio-Robinietalia pseudoacaciae*** and ***Robinietea*** | | | | | | |  |  |  |
| P caesp | N-Am. | Robinia pseudacacia | V | V | V | V | V | V | V | V | 8 |
| P caesp | Eur. | Sambucus nigra | V | V | III | V | V | III | V | I | 8 |
| H scap | Subcosmop. | Urtica dioica | IV | I | I | II | IV |  | V | I | 7 |
| T scap | Eurasiat. | Galium aparine | III | I |  | III | V | V | V | II | 7 |
| H scap | Eurasiat. | Geum urbanum | I |  |  | III | III | III | V | I | 6 |
| T rept | Medit. | Stellaria media | I |  | I | I | I |  | II | I | 6 |
| H caesp | Eurasiat./N-Am. | Poa trivialis | I | I | I |  | II | I |  |  | 5 |
| H caesp | Eurasiat. | Dactylis glomerata | I | I | I |  |  | IV | II |  | 5 |
| H bienn | Eur./W-Asiat. | Alliaria petiolata | II | I |  |  | I |  | I |  | 4 |
| H scap | Eurasiat. | Chelidonium majus |  |  |  |  | I | I | V | I | 4 |
| P scap | N-Am. | Acer negundo | I | I |  |  |  |  |  |  | 2 |
| T scap | Eur. | Galeopsis tetraihit |  |  |  |  |  |  |  | I | 1 |
| T scap | Eur./W-Asiat. | Moehringia trinervia |  |  |  |  |  |  |  | I | 1 |
|  |  | Taraxacum sect. Taraxacum |  |  |  |  |  |  |  | I | 1 |
| NP | Eurasiat./N-Am. | Rubus fruticosus agg. |  |  |  |  |  |  |  | II | 1 |
|  |  |  |  |  |  |  |  |  |  |  |  |
|  |  | **Other species** |  |  |  |  |  |  |  |  |  |
| P caesp | Eur./W-Asiat. | Crataegus monogyna | III | IV | IV | III | II | I | II | I | 8 |
| P caesp | Eur./W-Asiat. | Prunus spinosa | II | II | IV | II | I | I | II | I | 8 |
| P scap | Eur./W-Asiat. | Acer campestre | III | IV | II | II |  |  | II | I | 6 |
| P lian | Eur. | Clematis vitalba | IV | V | I | IV | V |  | II |  | 6 |
| H bienn | Eurasiat. | Arctium lappa | I | I |  | I | I | III | II |  | 6 |
| H bienn | Eurasiat. | Silene latifolia | I |  |  | II | I | II | II | I | 6 |
| H caesp | Eurasiat. | Brachypodium sylvaticum | II | I | III | I |  |  | IV |  | 5 |
| NP | Eurasiat. | Rosa canina | I |  |  | IV | I |  | I | III | 5 |
| P caesp | Eur. | Ulmus minor | III | IV |  | II | I |  | I |  | 5 |
| P scap | Eur./W-Asiat. | Prunus avium | I | II | II |  |  |  |  | I | 4 |
| P caesp | S-Eur. | Quercus pubescens  *s.l.* | II | IV | I |  | I |  |  |  | 4 |
| P scap | Eur. | Quercus robur |  |  | III | I |  |  | I | I | 4 |
| T scap | Circumb. | Fallopia convolvulus |  |  | I |  |  | IV | II | I | 4 |
| P caesp | Eur. | Corylus avellana | I | II |  | I |  |  |  |  | 3 |
| H caesp | Eur. | Melica uniflora | I |  | I |  |  |  | I |  | 3 |
| P caesp | SE-Eur./SW-Asiat. | Mespilus germanica |  | I | I |  | I |  |  |  | 3 |
| H scap | Eurasiat. | Campanula trachelium |  | I |  | I |  |  | II |  | 3 |
| T scap | Medit. | [Viola arvensis](http://www.floraitaliae.actaplantarum.org/viewtopic.php?f=40&t=61003&sid=64694e4b58542e9eb9467a035a96f5c9) |  |  |  |  |  | III | II | I | 3 |
| H scap | Eurasiat. | Cruciata laevipes | I |  | I | I |  |  |  |  | 3 |
| T scap | Eurasiat. | Lapsana communis |  |  |  | I |  |  | III | I | 3 |
|  |  |  |  |  |  |  |  |  |  |  |  |
|  |  | **Sporadic species** | 52 | 23 | 32 | 34 | 14 | 24 | 35 | 62 |  |

**List of plant communities referred to the columns of the synoptic Table S1:**

Column 1. *Melisso altissimae-Robinietum pseudoacaciae ass. nova hoc loco*;

Column 2. *Rubio peregrinae-Robinietum pseudoacaciae ass. nova hoc loco*;

Column 3. *Sambuco nigrae-Robinietum pseudoacaciae* from Tab. 9, Rel. 12, 17, 18, 23, 30, 32, 34, 57, 58, 63 in Arrigoni 1997;

Column 4. *Bryonio dioicae-Sambucetum nigrae* from Tab. 5 Rels. 1, 3-7, 10, 11 in Poldini and Vidali 1995;

Column 5. *Bryonio-Robinietum* from Tab. 7, Rels. 16-19, 22, 25, 26, 32-35 in Ubaldi 2003;

Column 6. *Balloto nigrae-Robinion pseudoacaciae* from Tab. 1, Rels. 1-15 in Jurko 1963;

Column 7. *Chelidionio majoris-Robinietum pseudoacaciae* from Tab. 2 in Jurko 1963;

Column 8. *Euphorbio cyparissiae-Robinietum pseudoacaciae* from Tab. 2 Column 4 in Vítková and Kolbek 2010.

**Sporadic species of the synoptic Table S1**

Col 1: *Cirsium arvense* I, *Chenopodium album* I , *Juglans regia* I, *Allium vineale* I, *Aegopodium podagraria* I, *Avena fatua* I, *Bromus ramosus* I, *Convolvulus arvensis* I, *Malus sylvestris* I, *Orobanche minor* I, *Pastinaca sativa* subsp. *urens* I, *Potentilla reptans* I, *Ranunculus lanuginosus* I, *Rumex acetosa* I, *Sambucus ebulus* I, *Viburnum lantana* I, *Convolvulus sepium* I, *Viola reichenbachiana* I, *Equisetum telmateia* I, *Anredera cordifolia* I, *Arundo donax* I, *Symphyotrichum × salignum* I, *Avena barbata* I, *Carduus pycnocephalus* s.l. I, *Cydonia oblonga* I, *Cynoglossum creticum* I, *Daphne laureola* I, *Daucus carota* s.l I, *Galium album* I, *Geranium rotondifolium* I, *Helleborus foetidus* I, *Scirpoides holoschoenus* I, *Ligustrum lucidum* I, *Linaria vulgaris* I, *Melittis melissophyllum* I, *Mercurialis annua* I, *Olea europaea* I, *Oxalis acetosella* I, *Oxalis dillenii* I, *Pinus pinea* I, *Populus alba* I, *Populus nigra* I, *Pulicaria dysenterica* I, *Ranunculus bulbosus* I, *Ficaria verna* I, *Ranunculus neapolitanus* I, *Rumex conglomeratus* I, *Solanum nigrum* I, *Sonchus asper* I, *Sorghum halepense* I, *Veronica chamaedrys* I, *Salix alba* I, *Symphytum bulbosum* I. Col. 2: *Aegopodium podagraria* I, *Bromopsis ramosa* I, *Orobanche minor* I, *Pastinaca sativa* subsp. *urens* I, *Sambucus ebulus* I, *Equisetum telmateia* I, *Pteridium aquilinum* subsp. *aquilinum* I, *Celtis australis* I, *Acer monspessulanum* I, *Acer opalus* subsp. *obtusatum* I, *Acer pseudoplatanus* I, *Alnus glutinosa* I, *Avena barbata* I, *Aegonychon purpurocaeruleum* I *Clinopodium vulgare* I, *Diplotaxis erucoides* I, *Picris hieracioides* s.l. I, *Primula veris* subsp. *columnae* I, *Prunus laurocerasus* I, *Smyrnium olusatrum* I, *Sorbus domestica* I, *Juglans regia* II. Col. 3*: Malus sylvestris* I, *Ranunculus lanuginosus* I, *Rumex acetosa* I, *Fallopia convolvulus* I, *Agrostis capillaris* I, *Galium mollugo* I, *Polygonatum multiflorum* I, *Poa sylvicola* I, *Holcus lanatus* I, *Agrostis stolonifera* I, *Asperula* cfr I, *Bromus* (tipo*) maximus* I, *Cardamine hirsuta* I, *Clematis flammula* I, *Cruciata glabra* I, *Frangula alnus* I, *Holcus mollis* I, *Lolium perenne* I, *Lonicera japonica* I, *Luzula forsteri* I, *Ostrya carpinifolia* I, *Pyracantha coccinea* I, *Pyrus communis* I, *Ranunculus* cfr. *polyanthemus* I, *Sorbus* *torminalis* I, *Pteridium* *aquilinum* II, *Quercus* *cerris* II, *Festuca* *heterophylla* II, *Ilex* *aquifolium* II, *Viola* *riviniana* II, *Castanea* *sativa* III, *Anemonoides* *nemorosa* III, *Quercus* *petraea* IV. Col. 4: *Holcus* *lanatus* I, *Celtis* *australis* I, *Alnus* *glutinosa* I, *Viola* *reichenbachiana* I, *Veronica* *chamaedrys* I, *Salix* *alba* I, *Rubus* *canescens* I, *Vincetoxicum* *hirundinaria* I, *Viola* *odorata* I, *Rhamnus* *cathartica* I, *Parietaria* *officinalis* I, *Erigeron* *annus* I, *Solanum* *dulcamara* I, *Amorpha* *fruticosa* I, *Arrenatherum* *elatius* I, *Buddleja* *davidii* I, *Carex* *hirta* I, *Circaea* *lutetiana* I, *Equisetum* *arvense* I, *Stellaria* *acquatica* I, *Parthenocissus* *quinquefolia* I, *Platanus* *hybrida* I, *Prunus* *domestica* I, *Rhus* *typhina* I, *Rubus* *corylifolius* I, *Rumex* *crispus* I, *Thalictrum* *aquilegifolium* I, *Valeriana* *officinalis* I, *Polygonatum* *odoratum* II, *Rosa* *arvensis* II, *Artemisia* *verlotiorum* II, *Carex* *pairaei,* *Poa* *sylvicola* III, *Convolvulus* *sepium* III, *Morus* *alba* III. Col. 5: *Viburnum* *lantana* I, *Taraxacum* *officinale* I, *Allium* *carinatum* I, *Alopecurus* *myosuroides* I, *Veronica* *hederifolia* I, *Cirsium* *vulgare* I, *Eupatorium* *cannabium* I, *Fumaria* *officinalis* I, *Helleborus* *viridis* subsp. *bocconei* I, *Papaver* *rhoeas* I, *Galium* *mollugo* II, *Geranium* *dissectum* II, *Avena* *fatua* III. Col. 6: *Rhamnus* *cathartica* I, *Chenopodium* *album* I, *Potentilla* *reptans* I, *Bromus* *tectorum* I, *Eryngium* *campestre* I, *Glechoma* *hederacea* I, *Sanguisorba* *minor* I, *Asparagus* *officinalis* I, *Berberis* *vulgaris* I, *Erodium* cicutarium I, *Tragopogon* *dubius* I, *Bromus* *squarrosus* I, *Carex* *spicata* I, *Galium* *verum* I, *Geranium* *pusillum* I, *Marrubium* *peregrinum* I, *Ornithogalum* *umbellatum* I, *Potentilla* *reptans* I, *Potentilla* *incana* I, *Prunella* *vulgaris* I, *Rubus* sp. I, *Viola* *rupetris* I, *Cirsium* *arvense* II, *Poa* *compressa* II, *Torilis* *japonica* V. Col. 7: *Taraxacum* *officinale* I, *Hypericum* *perforatum* I, *Crataegus* *curvisepala* I, *Crataegus* *laevigata* I, *Elymus caninus* I, *Alopecurus* *pratensis* I, *Anthriscus* *trichosperma* I, *Bromopsis* *benekenii* I, *Clinopodium* *vulgare* I, *Carex* *pilosa* I, *Dryopteris* *filix* *max* I, *Fagus* *sylvatica* I, *Luzula* *nemorosa* I, *Lysimachia* *nummularia* I, *Mycelis* *muralis* I, *Oxalis* *stricta* I, *Alkekengi* *officinarum* I, *Polygonum* *hydropiper* I, *Primula* *elatior* I, *Pulmonaria* *mollis* I, *Scrophularia* *nodosa* I, *Bromus* *tectorum* II, *Glechoma* *hederacea* II, *Viola* *odorata* II, *Polygonatum* *multiflorum* II, *Quercus* *cerris* II, *Galeopsis* *pubescens* II, *Galeopsis* *speciosa* II, *Sonchus* *mollis* II, *Stachys* *sylvatica* II, *Stellaria* *nemorium* II, *Fragaria* *moschata* III. *Lamium* *purpureum* III, *Viola* *sylvatica* III, *Torilis* *japonica* IV. Col. 8: *Crataegus* *curvisepala* I, *Crataegus* *laevigata* I, *Galeopsis* *pubescens* I, *Lapsana* *communis* I, *Eryngium* *campestre* I, *Sanguisorba* *minor* I, *Polygonatum* *odoratum* I, *Agrostis* *capillaris* I, *Allium* *vineale* I, *Convolvulus* *arvensis* I, *Fraxinus* *excelsior* L. I, *Allium* *oleraceum* I, *Anthoxanthum* *odoratum* I, *Crataegus* sp. I, *Festuca* *rubra* agg. I, *Fragaria* *vesca* I, *Fragaria* *viridis* I, *Impantientiens* *parviflora* I, *Ribes* *uva*-*crispa* I, *Sorbus* *acuparia* I, *Teucrium* *chamaedrys* I, *Achillea* *millefolium* I, *Allium* *lusitanicum* I, *Anthericum* *liliago* I, *Asplenium* *septentrionale* I, *Avenella* *flexuosa* I, *Brachypodium* *pinnatum* I, *Bupleurum* *falcatum* I, *Arabidopsis* *arenosa* I, *Centaurea* *triumfettii* I, *Cotoneaster* *integerrimus* I, *Echium* *vulgare* I, *Festuca* *rupicola* I, *Galeopsis* *ladanum* I, *Galium* *glaucum* I, *Geranium* *sanguineum* I, *Pilosella officinarum* I, *Hylotelephium* *maximum* I, *Juniperus* *communis* I, *Pimpinella* *saxifraga* I, *Pinus* *sylvestris* I, *Pulsatilla* *pratensis* I, *Pyrus* *pyraster* I, *Sedum* *acre* I, *Sedum* *album* I, *Sedum* *sexangulare* I, *Stipa* *pennata* I, *Stipa* *pulcherrima* I, *Thlaspi* *perfoliatum* I, *Veronica* *sublobata* I, *Viola* *collina* I, *Hypericum* *perforatum* II, *Quercus* *petraea* II, *Asperula* *cynanchica* II, *Aurinia* *saxatilis* II, *Dianthus* *carthusianorum* II, *Potentilla* *incana* II, *Potentilla* *verna* II, *Sedum* *rupestre* II, *Seseli* *osseum* II, *Thymus* *pulegioides* II, *Vincetoxicum* *hirundinaria* III, *Festuca* *pallens* III.

**Table S2.** Correlation coeffiecient R2 and significances of ecological variables considered (Ellemberg indicators as vectors; geology and morphostructure as factors) with phytosociological relevès position (indirect gradient analysis) in the NMDS1 and NMDS2 axis. Significance codes P<: 0 ‘***’ 0.001 ‘**’ 0.01 ‘*’ 0.05 ‘.’ 0.1 ‘ ’ 1

|  | **NMDS1** | **NMDS2** | **R2** |
| --- | --- | --- | --- |
| **U Humidity** | 0.29298 | 0.95612 | 0.1411* |
| **N NUtrient** | 0.99299 | -0.11816 | 0.4977*** |
| **Geology** |  |  | 0.2749*** |
| **Morphostructure** |  |  | 0.2620*** |

**Table S3.** Weighted chorological spectra of the *Robinia pseudoacacia* syntaxa presented in Table S1. (values represent percentages)
